# Supplementary material for: Assessment of the Impact of COVID-19 Lockdown on the Nutritional Status and Lipid Profile of Employees in a Teaching Hospital in Rome: A Retrospective Cohort Study
Source: MDPI journal article supplement (doi:10.3390/ijerph19084549), 2022-04-09
Supplement: s1 [file s1]

**Table S1.** Linear regression model of  $\Delta$  BMI

| Variables            | Standardized<br>Beta (p)<br><i>Full model</i> | Standardized<br>Beta (p)<br><i>Stepwise</i> | Standardized<br>Beta (p)<br><i>Females</i> | Standardized<br>Beta (p)<br><i>Males</i> | Standardized<br>Beta (p)<br><i>Over 52 years</i> | Standardized<br>Beta (p)<br><i>Under 52<br/>years</i> | Standardized<br>Beta (p)<br><i>Subgroup with<br/>PA</i> |
|----------------------|-----------------------------------------------|---------------------------------------------|--------------------------------------------|------------------------------------------|--------------------------------------------------|-------------------------------------------------------|---------------------------------------------------------|
| <b>Gender</b>        |                                               |                                             |                                            |                                          |                                                  |                                                       |                                                         |
| Males*               |                                               |                                             |                                            |                                          |                                                  |                                                       |                                                         |
| Females              | -0,018 (0,603)                                | -                                           | -                                          | -                                        | -                                                | -                                                     | -0,131 (0,006)                                          |
| <b>Age</b>           | -0,064 (0,065)                                | -0,058 (0,069)                              | -                                          | -0,127 (0,017)                           | -0,107 (0,014)                                   | -                                                     | -0,080 (0,098)                                          |
| <b>Role</b>          |                                               |                                             |                                            |                                          |                                                  |                                                       |                                                         |
| Physicians           | -0,032 (0,702)                                | -                                           | -0,094 (0,018)                             | -                                        | -                                                | -                                                     | -                                                       |
| Nurses               | 0,063 (0,476)                                 | 0,119 (<0,001)                              |                                            | 0,123 (0,018)                            | -                                                | 0,130 (0,004)                                         | 0,166 (0,001)                                           |
| Technicians          | -0,027 (0,689)                                | -                                           | -                                          | -                                        | -                                                | -                                                     | -                                                       |
| Administratives*     |                                               |                                             |                                            |                                          |                                                  |                                                       |                                                         |
| <b>Judgment</b>      |                                               |                                             |                                            |                                          |                                                  |                                                       |                                                         |
| Eligible*            |                                               |                                             |                                            |                                          |                                                  |                                                       |                                                         |
| With Limitation      | -0,027 (0,412)                                | -                                           | -                                          | -                                        | -                                                | -                                                     | -                                                       |
| <b>Biological</b>    |                                               |                                             |                                            |                                          |                                                  |                                                       |                                                         |
| No*                  |                                               |                                             |                                            |                                          |                                                  |                                                       |                                                         |
| Yes                  | -0,050 (0,112)                                | -                                           | -0,108 (0,009)                             | -                                        | -                                                | -                                                     | -                                                       |
| <b>VDU</b>           |                                               |                                             |                                            |                                          |                                                  |                                                       |                                                         |
| No*                  |                                               |                                             |                                            |                                          |                                                  |                                                       |                                                         |
| Yes                  | 0,049 (0,164)                                 | 0,060 (0,064)                               | -                                          | -                                        | -                                                | -                                                     | 0,084 (0,076)                                           |
| <b>MHL/MPH</b>       |                                               |                                             |                                            |                                          |                                                  |                                                       |                                                         |
| No*                  |                                               |                                             |                                            |                                          |                                                  |                                                       |                                                         |
| Yes                  | 0,029 (0,538)                                 | -                                           | -                                          | -                                        | -                                                | -                                                     | -                                                       |
| <b>Night shift</b>   |                                               |                                             |                                            |                                          |                                                  |                                                       |                                                         |
| No*                  |                                               |                                             |                                            |                                          |                                                  |                                                       |                                                         |
| Yes                  | -0,040 (0,281)                                | -                                           | -                                          | -0,122 (0,019)                           | -                                                | -                                                     | -                                                       |
| <b>Chemical</b>      |                                               |                                             |                                            |                                          |                                                  |                                                       |                                                         |
| No*                  |                                               |                                             |                                            |                                          |                                                  |                                                       |                                                         |
| Yes                  | -0,025 (0,449)                                | -                                           | -0,102 (0,014)                             | -                                        | -                                                | -                                                     | -                                                       |
| <b>Smoker</b>        |                                               |                                             |                                            |                                          |                                                  |                                                       |                                                         |
| No*                  |                                               |                                             |                                            |                                          |                                                  |                                                       |                                                         |
| Yes                  | 0,043 (0,178)                                 | -                                           | -                                          | -                                        | -                                                | 0,096 (0,037)                                         | -                                                       |
| <b>Diabetes</b>      |                                               |                                             |                                            |                                          |                                                  |                                                       |                                                         |
| No*                  |                                               |                                             |                                            |                                          |                                                  |                                                       |                                                         |
| Yes                  | -0,024 (0,457)                                | -                                           | -                                          | -                                        | -                                                | -                                                     | -                                                       |
| <b>Hypertension</b>  |                                               |                                             |                                            |                                          |                                                  |                                                       |                                                         |
| No*                  |                                               |                                             |                                            |                                          |                                                  |                                                       |                                                         |
| Yes                  | 0,011 (0,734)                                 | -                                           | -                                          | -                                        | -                                                | -                                                     | -                                                       |
| <b>Heart Disease</b> |                                               |                                             |                                            |                                          |                                                  |                                                       |                                                         |
| No*                  |                                               |                                             |                                            |                                          |                                                  |                                                       |                                                         |
| Yes                  | 0,073 (0,023)                                 | 0,070 (0,025)                               | -                                          | 0,092 (0,067)                            | 0,104 (0,017)                                    | -                                                     | -                                                       |

|                          |                |       |                         |       |               |                         |                         |
|--------------------------|----------------|-------|-------------------------|-------|---------------|-------------------------|-------------------------|
| <b>Thyroid Disease</b>   |                |       |                         |       |               |                         |                         |
| No*                      |                |       |                         |       |               |                         |                         |
| Yes                      | 0,050 (0,117)  | -     | -0,069 (0,083)          | -     | 0,080 (0,067) | -                       | -                       |
| <b>Cancer</b>            |                |       |                         |       |               |                         |                         |
| No*                      |                |       |                         |       |               |                         |                         |
| Yes                      | -0,020 (0,523) | -     | -                       | -     | -             | -                       | -                       |
| <b>AUDIT-C</b>           | -0,029 (0,379) | -     | -0,089 ( <b>0,026</b> ) | -     | -             | -0,106 ( <b>0,022</b> ) | -                       |
| <b>Physical Activity</b> |                |       |                         |       |               |                         |                         |
| No*                      |                |       |                         |       |               |                         |                         |
| Yes                      | -              | -     | -                       | -     | -             | -                       | -0,114 ( <b>0,015</b> ) |
| <b>R<sup>2</sup></b>     | 0,034          | 0,023 | 0,04                    | 0,048 | 0,028         | 0,04                    | 0,056                   |

\*reference group

**Table S2.** Linear regression model of  $\Delta$  LDL

| Variables            | Standardized<br>Beta (p)<br><i>Full model</i> | Standardized<br>Beta (p)<br><i>Stepwise</i> | Standardized<br>Beta (p)<br><i>Females</i> | Standardized<br>Beta (p)<br><i>Males</i> | Standardized<br>Beta (p)<br><i>Over 52 years</i> | Standardized<br>Beta (p)<br><i>Under 52<br/>years</i> | Standardized<br>Beta (p)<br><i>Subgroup with<br/>PA</i> |
|----------------------|-----------------------------------------------|---------------------------------------------|--------------------------------------------|------------------------------------------|--------------------------------------------------|-------------------------------------------------------|---------------------------------------------------------|
| <b>Gender</b>        |                                               |                                             |                                            |                                          |                                                  |                                                       |                                                         |
| Males*               |                                               |                                             |                                            |                                          |                                                  |                                                       |                                                         |
| Females              | 0,034 (0,325)                                 | -                                           | -                                          | -                                        | -                                                | -                                                     | -                                                       |
| <b>Age</b>           |                                               |                                             |                                            |                                          |                                                  |                                                       |                                                         |
|                      | 0,030 (0,388)                                 | -                                           | -                                          | -                                        | -                                                | -                                                     | -                                                       |
| <b>Role</b>          |                                               |                                             |                                            |                                          |                                                  |                                                       |                                                         |
| Physicians           | 0,117 (0,160)                                 | 0,078 (0,013)                               | -                                          | 0,094 (0,058)                            | 0,092 (0,034)                                    | -                                                     | 0,180 (<0,001)                                          |
| Nurses               | 0,019 (0,827)                                 | -                                           | -0,080 (0,048)                             | -                                        | -                                                | -0,083 (0,093)                                        | -                                                       |
| Technicians          | 0,017 (0,804)                                 | -                                           | -                                          | -                                        | -                                                | -0,112 (0,026)                                        | -                                                       |
| Administratives*     |                                               |                                             |                                            |                                          |                                                  |                                                       |                                                         |
| <b>Judgment</b>      |                                               |                                             |                                            |                                          |                                                  |                                                       |                                                         |
| Eligible*            |                                               |                                             |                                            |                                          |                                                  |                                                       |                                                         |
| With Limitation      | -0,016 (0,632)                                | -                                           | -                                          | -                                        | -                                                | -                                                     | -                                                       |
| <b>Biological</b>    |                                               |                                             |                                            |                                          |                                                  |                                                       |                                                         |
| No*                  |                                               |                                             |                                            |                                          |                                                  |                                                       |                                                         |
| Yes                  | -0,008 (0,797)                                | -                                           | -                                          | -                                        | -                                                | -                                                     | -                                                       |
| <b>VDU</b>           |                                               |                                             |                                            |                                          |                                                  |                                                       |                                                         |
| No*                  |                                               |                                             |                                            |                                          |                                                  |                                                       |                                                         |
| Yes                  | -0,010 (0,766)                                | -                                           | -                                          | -                                        | -                                                | -                                                     | -0,079 (0,076)                                          |
| <b>MHL/MPH</b>       |                                               |                                             |                                            |                                          |                                                  |                                                       |                                                         |
| No*                  |                                               |                                             |                                            |                                          |                                                  |                                                       |                                                         |
| Yes                  | 0,038 (0,408)                                 | -                                           | -                                          | -                                        | -                                                | -                                                     | -                                                       |
| <b>Night shift</b>   |                                               |                                             |                                            |                                          |                                                  |                                                       |                                                         |
| No*                  |                                               |                                             |                                            |                                          |                                                  |                                                       |                                                         |
| Yes                  | -0,023 (0,533)                                | -                                           | -                                          | -                                        | -                                                | -0,123 (0,008)                                        | -                                                       |
| <b>Chemical</b>      |                                               |                                             |                                            |                                          |                                                  |                                                       |                                                         |
| No*                  |                                               |                                             |                                            |                                          |                                                  |                                                       |                                                         |
| Yes                  | -0,059 (0,071)                                | -0,062 (0,047)                              | -0,099 (0,015)                             | -                                        | -0,079 (0,068)                                   | -                                                     | -                                                       |
| <b>Smoker</b>        |                                               |                                             |                                            |                                          |                                                  |                                                       |                                                         |
| No*                  |                                               |                                             |                                            |                                          |                                                  |                                                       |                                                         |
| Yes                  | 0,018 (0,572)                                 | -                                           | -                                          | -                                        | -                                                | -                                                     | -                                                       |
| <b>Diabetes</b>      |                                               |                                             |                                            |                                          |                                                  |                                                       |                                                         |
| No*                  |                                               |                                             |                                            |                                          |                                                  |                                                       |                                                         |
| Yes                  | -0,053 (0,095)                                | -                                           | -                                          | -                                        | -0,098 (0,025)                                   | -                                                     | -0,096 (0,030)                                          |
| <b>Hypertension</b>  |                                               |                                             |                                            |                                          |                                                  |                                                       |                                                         |
| No*                  |                                               |                                             |                                            |                                          |                                                  |                                                       |                                                         |
| Yes                  | 0,035 (0,291)                                 | -                                           | -                                          | -                                        | -                                                | -                                                     | -                                                       |
| <b>Heart Disease</b> |                                               |                                             |                                            |                                          |                                                  |                                                       |                                                         |
| No*                  |                                               |                                             |                                            |                                          |                                                  |                                                       |                                                         |
| Yes                  | -0,119 (<0,001)                               | -0,123(<0,001)                              | -                                          | -0,196 (<0,001)                          | -0,137 (0,002)                                   | -                                                     | -0,140 (0,002)                                          |

|                          |                |                |                |                |       |                |                 |
|--------------------------|----------------|----------------|----------------|----------------|-------|----------------|-----------------|
| <b>Thyroid Disease</b>   |                |                |                |                |       |                |                 |
| No*                      |                |                |                |                |       |                |                 |
| Yes                      | -0,053 (0,099) | -              | -0,085 (0,034) | -              | -     | -              | -0,086 (0,051)  |
| <b>Cancer</b>            |                |                |                |                |       |                |                 |
| No*                      |                |                |                |                |       |                |                 |
| Yes                      | -0,057 (0,072) | -0,055 (0,076) | -              | -0,092 (0,062) | -     | -0,088 (0,052) | -0,192 (<0,001) |
| <b>AUDIT-C</b>           | 0,004 (0,909)  | -              | -              | -              | -     | -              | -               |
| <b>Physical Activity</b> |                |                |                |                |       |                |                 |
| No*                      |                |                |                |                |       |                |                 |
| Yes                      |                |                |                |                |       |                | -0,086 (0,058)  |
| <b>R<sup>2</sup></b>     | 0,035          | 0,026          | 0,022          | 0,054          | 0,044 | 0,027          | 0,107           |

\*reference group

**Table S3.** Linear regression model of  $\Delta$  total cholesterol

| Variables              | Standardized<br>Beta (p)<br><i>Full model</i> | Standardized<br>Beta (p)<br><i>Stepwise</i> | Standardized<br>Beta (p)<br><i>Females</i> | Standardized<br>Beta (p)<br><i>Males</i> | Standardized<br>Beta (p)<br><i>Over 52 years</i> | Standardized<br>Beta (p)<br><i>Under 52<br/>years</i> | Standardized<br>Beta (p)<br><i>Subgroup<br/>with PA</i> |
|------------------------|-----------------------------------------------|---------------------------------------------|--------------------------------------------|------------------------------------------|--------------------------------------------------|-------------------------------------------------------|---------------------------------------------------------|
| <b>Gender</b>          |                                               |                                             |                                            |                                          |                                                  |                                                       |                                                         |
| Males*                 |                                               |                                             |                                            |                                          |                                                  |                                                       |                                                         |
| Females                | 0,044 (0,213)                                 | -                                           | -                                          | -                                        | -                                                | -                                                     | -                                                       |
| <b>Age</b>             | 0,050 (0,147)                                 | -                                           | 0,083 ( <b>0,044</b> )                     | -                                        | -                                                | -                                                     | -                                                       |
| <b>Role</b>            |                                               |                                             |                                            |                                          |                                                  |                                                       |                                                         |
| Physicians             |                                               |                                             |                                            |                                          |                                                  |                                                       |                                                         |
| Nurses                 | 0,104 (0,210)                                 | 0,056 (0,071)                               | -                                          | -                                        | -                                                | -0,272 (0,052)                                        | 0,146 ( <b>0,001</b> )                                  |
| Technicians            | -0,002 (0,980)                                |                                             | -0,153 ( <b>0,003</b> )                    | -                                        | -                                                | -0,355 ( <b>0,018</b> )                               | -                                                       |
| Administratives*       | 0,041 (0,539)                                 | -                                           | -                                          | -                                        | -                                                | -0,267 ( <b>0,007</b> )                               | -                                                       |
| <b>Judgment</b>        |                                               |                                             |                                            |                                          |                                                  |                                                       |                                                         |
| Eligible*              |                                               |                                             |                                            |                                          |                                                  |                                                       |                                                         |
| With Limitation        | 0,003 (0,935)                                 | -                                           | -                                          | -                                        | -                                                | -                                                     | -                                                       |
| <b>Biological</b>      |                                               |                                             |                                            |                                          |                                                  |                                                       |                                                         |
| No*                    |                                               |                                             |                                            |                                          |                                                  |                                                       |                                                         |
| Yes                    | -0,027 (0,386)                                | -                                           | -                                          | -                                        | -                                                | -                                                     | -                                                       |
| <b>VDU</b>             |                                               |                                             |                                            |                                          |                                                  |                                                       |                                                         |
| No*                    |                                               |                                             |                                            |                                          |                                                  |                                                       |                                                         |
| Yes                    | -0,030 (0,393)                                | -                                           | -                                          | -                                        | -                                                | -                                                     | -                                                       |
| <b>MHL/MPH</b>         |                                               |                                             |                                            |                                          |                                                  |                                                       |                                                         |
| No*                    |                                               |                                             |                                            |                                          |                                                  |                                                       |                                                         |
| Yes                    | 0,061 (0,187)                                 | -                                           | 0,098 (0,055)                              | -                                        | -                                                | -                                                     | -                                                       |
| <b>Night shift</b>     |                                               |                                             |                                            |                                          |                                                  |                                                       |                                                         |
| No*                    |                                               |                                             |                                            |                                          |                                                  |                                                       |                                                         |
| Yes                    | -0,038 (0,300)                                | -                                           | -                                          | -                                        | -                                                | -0,115 ( <b>0,013</b> )                               | -                                                       |
| <b>Chemical</b>        |                                               |                                             |                                            |                                          |                                                  |                                                       |                                                         |
| No*                    |                                               |                                             |                                            |                                          |                                                  |                                                       |                                                         |
| Yes                    | -0,057 (0,079)                                | -                                           | -0,095 ( <b>0,019</b> )                    | -                                        | -                                                | -                                                     | -                                                       |
| <b>Smoker</b>          |                                               |                                             |                                            |                                          |                                                  |                                                       |                                                         |
| No*                    |                                               |                                             |                                            |                                          |                                                  |                                                       |                                                         |
| Yes                    | 0,005 (0,886)                                 | -                                           | -                                          | -                                        | -                                                | -                                                     | -                                                       |
| <b>Diabetes</b>        |                                               |                                             |                                            |                                          |                                                  |                                                       |                                                         |
| No*                    |                                               |                                             |                                            |                                          |                                                  |                                                       |                                                         |
| Yes                    | -0,036 (0,263)                                | -                                           | -                                          | -                                        | -0,082 (0,062)                                   | -                                                     | -                                                       |
| <b>Hypertension</b>    |                                               |                                             |                                            |                                          |                                                  |                                                       |                                                         |
| No*                    |                                               |                                             |                                            |                                          |                                                  |                                                       |                                                         |
| Yes                    | 0,025 (0,444)                                 | -                                           | -                                          | -                                        | -                                                | -                                                     | -                                                       |
| <b>Heart Disease</b>   |                                               |                                             |                                            |                                          |                                                  |                                                       |                                                         |
| No*                    |                                               |                                             |                                            |                                          |                                                  |                                                       |                                                         |
| Yes                    | -0,138 (< <b>0,001</b> )                      | -0,133 (< <b>0,001</b> )                    | -                                          | -0,207(< <b>0,001</b> )                  | -0,155 (< <b>0,001</b> )                         | -                                                     | -0,148 ( <b>0,001</b> )                                 |
| <b>Thyroid Disease</b> |                                               |                                             |                                            |                                          |                                                  |                                                       |                                                         |
| No*                    |                                               |                                             |                                            |                                          |                                                  |                                                       |                                                         |
| Yes                    | -0,040 (0,205)                                | -                                           | -0,071 (0,077)                             | -                                        | -                                                | -                                                     | -                                                       |
| <b>Cancer</b>          |                                               |                                             |                                            |                                          |                                                  |                                                       |                                                         |
| No*                    |                                               |                                             |                                            |                                          |                                                  |                                                       |                                                         |
| Yes                    | -0,051 (0,106)                                | -                                           | -                                          | -0,110 ( <b>0,025</b> )                  | -                                                | -0,176(< <b>0,001</b> )                               | -0,194 (< <b>0,001</b> )                                |
| <b>AUDIT-C</b>         | 0,006 (0,853)                                 | -                                           | -                                          | -                                        | -                                                | -                                                     | -                                                       |

|                   |       |      |       |       |       |      |                |
|-------------------|-------|------|-------|-------|-------|------|----------------|
| Physical Activity |       |      |       |       |       |      |                |
| No*               |       |      |       |       |       |      |                |
| Yes               |       |      |       |       |       |      | -0,097 (0,033) |
| R <sup>2</sup>    | 0,035 | 0,02 | 0,032 | 0,054 | 0,035 | 0,05 | 0,075          |

\*reference group
